# Parental lifespan extension improves offspring fitness

Martin I. Lind<sup>1, †, \*</sup>, Sanjana Ravindran<sup>1, †</sup>, Zuzana Sekajova<sup>1</sup>, Hanne Carlsson<sup>1, 2</sup>,  
Andrea Hinas<sup>3</sup> and Alexei A. Maklakov<sup>1, 2, \*</sup>

<sup>1</sup> Animal Ecology, Department of Ecology and Genetics, Uppsala University, Norbyvägen  
18D, Uppsala 752 36, Sweden

<sup>2</sup> School of Biological Sciences, University of East Anglia, Norwich Research Park, Norwich  
NR4 7TJ, UK

<sup>3</sup> Department of Cell and Molecular Biology, Uppsala University, PO Box 596, Uppsala 751  
24, Sweden

† these authors contributed equally to the study

\* Authors for correspondence:

Martin I. Lind - [martin.i.lind@gmail.com](mailto:martin.i.lind@gmail.com)

Alexei A. Maklakov - [a.maklakov@uea.ac.uk](mailto:a.maklakov@uea.ac.uk)

Keywords: ageing, antagonistic pleiotropy, functional trade-offs, hyperfunction, IIS  
signalling, parental effects, senescence

20 **Abstract**

21 Classical theory maintains that ageing evolves via energy trade-offs between reproduction  
22 and survival leading to accumulation of unrepaired cellular damage with age. In contrast, the  
23 emerging new theory postulates that ageing evolves because of deleterious late-life hyper-  
24 function of reproduction-promoting genes leading to excessive biosynthesis in late-life. The  
25 hyper-function theory uniquely predicts that optimizing nutrient-sensing molecular signalling  
26 in adulthood can simultaneously postpone ageing and increase Darwinian fitness. Here we  
27 show that reducing evolutionarily conserved insulin/IGF-1 nutrient-sensing signalling via  
28 *daf-2* RNA interference (RNAi) fulfils this prediction in *Caenorhabditis elegans* nematodes.  
29 Long-lived *daf-2* RNAi parents showed normal fecundity as self-fertilizing hermaphrodites  
30 and improved late-life reproduction when mated to males. Remarkably, the offspring of *daf-2*  
31 RNAi parents had higher Darwinian fitness across three different genotypes. Thus, reduced  
32 nutrient-sensing signalling in adulthood improves both parental longevity and offspring  
33 quality supporting the emerging view that sub-optimal gene expression in late-life lies at the  
34 heart of ageing.

35

## 36 **Introduction**

37 The long-standing paradigm, the “disposable soma” theory of ageing, postulates that ageing  
38 results from competitive energy allocation between somatic maintenance and reproduction  
39 leading to slow accumulation of unrepaired cellular damage with age [1-3]. However, this  
40 paradigm has suffered several setbacks in recent years, with many empirical studies  
41 challenging the importance of energy trade-offs in organismal senescence [reviewed in 4, 5-  
42 9]. Instead, several authors proposed that ageing can result from molecular signalling  
43 networks being optimized for development, growth and early-life reproduction rather than for  
44 late-life reproduction and longevity [6, 10-15]. Specifically, downregulation of evolutionarily  
45 conserved nutrient-sensing signalling pathways that govern biosynthesis in response to  
46 nutrient availability can achieve increased longevity without a concomitant decrease in  
47 reproduction in model organisms [8, 10, 16]. The emerging “hyper-function” theory of  
48 ageing maintains that ageing is driven by excessive nutrient-sensing molecular signalling in  
49 late-life, which results in cellular hypertrophy leading to age-related pathologies [6, 11-15].  
50 These ideas can be traced back to George Williams, who suggested that the same  
51 physiological processes that are beneficial for early-life fitness can become detrimental in  
52 late-life because of the reduced strength of natural selection on late-life function [17].

53

54 Because the main cost of longevity appears to be associated with reduced early-life function,  
55 it seems plausible that age-specific modification of gene expression can potentially  
56 circumvent this problem. In their landmark study, Dillin et al. (2002) used age-specific RNA  
57 interference (RNAi) approach to knock down *daf-2* gene expression in *Caenorhabditis*  
58 *elegans* nematodes across the life cycle of the worms. While early-life feeding with bacteria  
59 expressing *daf-2* double-stranded RNA resulted in reduced early-life reproduction, there was

60 no detrimental effect of *daf-2* RNAi in adult worms, which enjoyed two-fold lifespan  
61 extension without any cost to reproduction [10]. Nevertheless, while this study provided a  
62 powerful example for the cost-free lifespan extension, it is possible that key fitness costs  
63 were overlooked. One possibility is that fecundity costs become apparent only in mated  
64 hermaphrodites. In nature, *C. elegans* live in populations with small (~0.3%) yet appreciable  
65 number of males living among self-fertilising hermaphrodites with sometimes high levels of  
66 outcrossing [18], and mating, as well as mere presence of male-derived pheromones, has  
67 pronounced effects of the life-history of hermaphrodites [19-21]. Perhaps more importantly,  
68 it is possible that while fecundity is not affected, the fitness of the offspring and, therefore,  
69 Darwinian fitness of the parents, are compromised. The trade-off between offspring number  
70 and quality is well known from a number of study systems [22], and is a potential explanation  
71 for the apparent lack of fitness costs in the previous studies. To investigate this possibility,  
72 we need to understand how late-life reduction in nutrient-sensing signalling affects longevity,  
73 offspring number and offspring quality. Here we show that *daf-2* RNAi in adult *C. elegans*  
74 results in increased parental longevity, increased parental investment, and offspring fitness  
75 across three genetic backgrounds. We discuss these findings in the light of the emerging new  
76 theories of ageing and suggest that they support the hypothesis that suboptimal gene  
77 expression in late-life shapes the evolution of ageing.

78

## 79 **Results**

80 First off, we confirmed that *daf-2* RNAi significantly extended the lifespan of unmated N2  
81 wild-type hermaphrodite worms (censoring matricide:  $z = -4.94$ ,  $df = 1$ ,  $p < 0.001$ , Fig. 1A;  
82 including matricide as dead:  $z = -4.97$ ,  $df = 1$ ,  $p < 0.001$ ), as expected from previous studies  
83 [10]. In addition, for mated N2, *daf-2* RNAi extended lifespan when matricide was censored

84 ( $z = -2.42$ ,  $df = 1$ ,  $p = 0.016$ , Fig. 1B) but not if matricidal worms were included as dead ( $z =$   
85  $0.16$ ,  $df = 1$ ,  $p = 0.87$ ) because of an increase in matricide in the late reproducing mated *daf-2*  
86 RNAi N2.

87

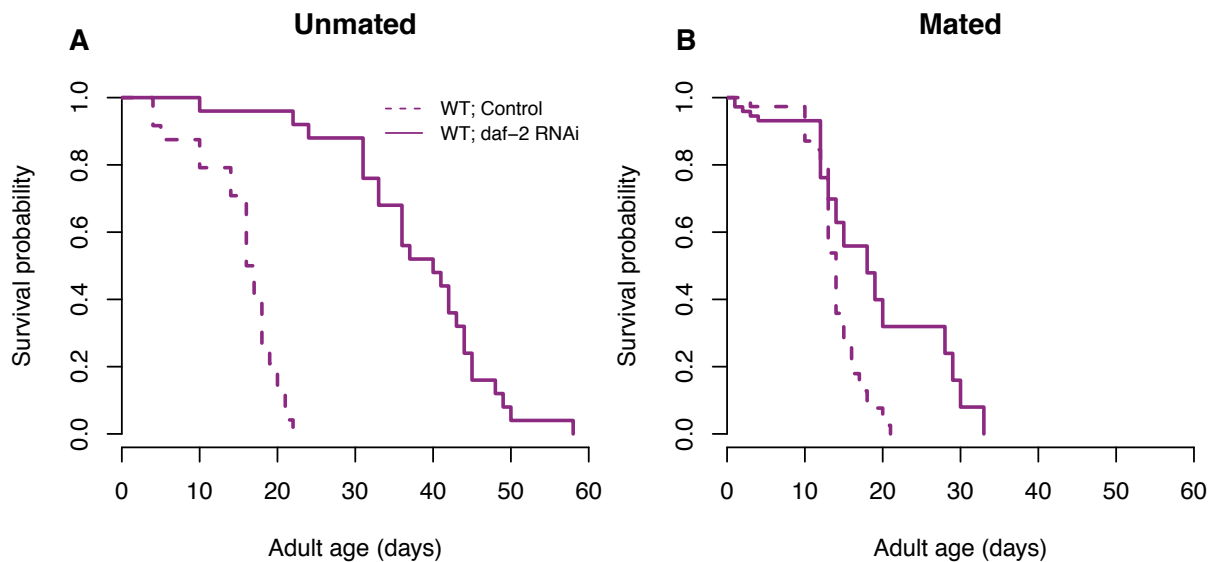

88 **Fig. 1. The effect of *daf-2* RNAi on lifespan.** Survival probability for (A) unmatred or (B)  
89 mated N2 wild-type worms, treated with either *daf-2* RNAi (solid lines) or control empty  
90 vector (broken lines) from adulthood onwards.

92

93 We did not find any effect of *daf-2* RNAi on total reproduction (unmated:  $F = 0.32$ ,  $df = 1$ ,  $p$   
94  $= 0.58$ ; mated:  $\chi^2 = 1.11$ ,  $df = 1$ ,  $p = 0.29$ ) or individual fitness  $\lambda_{ind}$  (unmated:  $F = 0.30$ ,  $df = 1$ ,  
95  $p = 0.59$ ; mated:  $\chi^2 = 0.43$ ,  $df = 1$ ,  $p = 0.51$ ) for neither unmatred nor mated N2 (Table 1, Fig.  
96 2). However, *daf-2* RNAi had a positive effect on late (day 5+) reproduction for mated  
97 hermaphrodites ( $\chi^2 = 24.76$ ,  $df = 1$ ,  $p < 0.001$ , Fig. 2B).

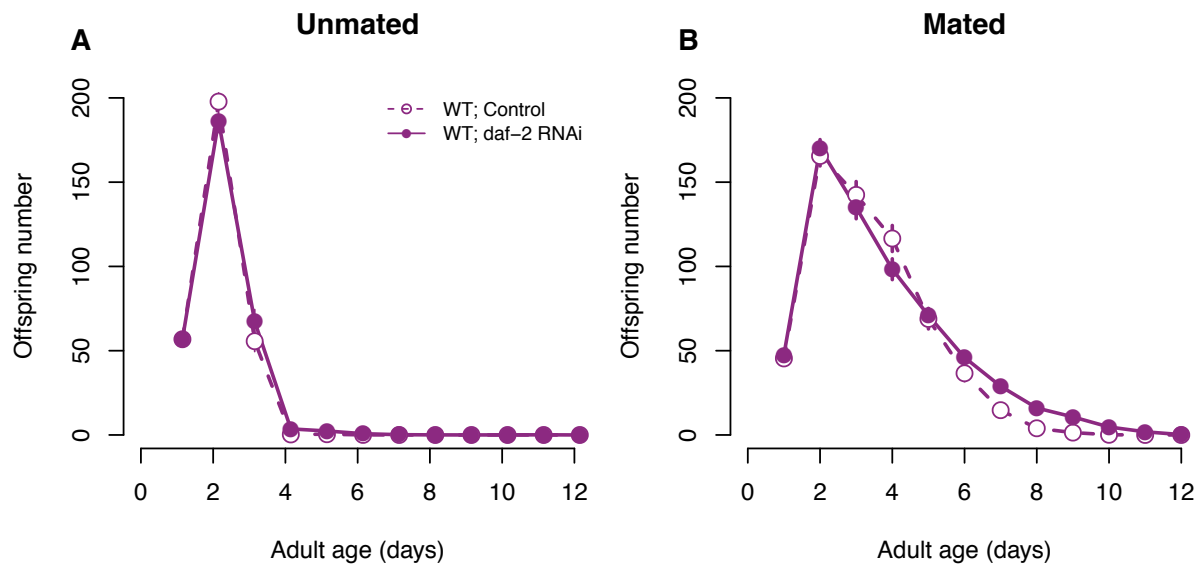

98

99 **Fig. 2. The effect of *daf-2* RNAi on reproduction.** Daily offspring number for (A) unmatd

100 or (B) mated N2 wild-type worms, treated with either *daf-2* RNAi (solid lines, filled symbols)

101 or control empty vector (broken lines, open symbols) from adulthood onwards. Symbols

102 represent mean  $\pm$  SE.

103

104 **Table 1. The effect of *daf-2* RNAi on reproduction.** Total reproduction and individual

105 fitness ( $\lambda_{ind}$ ) for unmatd and mated *C. elegans* N2 wild-type treated with either empty vector

106 (Control) or *daf-2* RNAi from adulthood onwards. All values expressed as mean  $\pm$  SE.

| RNAi treatment    | Total reproduction |                  | Fitness ( $\lambda_{ind}$ ) |                 |
|-------------------|--------------------|------------------|-----------------------------|-----------------|
|                   | unmatd             | mated            | unmatd                      | mated           |
| Control           | 311.0 $\pm$ 7.0    | 595.7 $\pm$ 24.3 | 4.66 $\pm$ 0.03             | 4.47 $\pm$ 0.05 |
| <i>daf-2</i> RNAi | 317.4 $\pm$ 8.9    | 630.5 $\pm$ 22.2 | 4.63 $\pm$ 0.05             | 4.50 $\pm$ 0.05 |

107

108 In a second experiment, using unmatd hermaphrodites only, we investigated the effect of

109 *daf-2* RNAi on parent lifespan and offspring lifespan and reproduction across three genetic

110 backgrounds (N2 wild-type and the mutants *ppw-1* and *rrf-1*, that are deficient for germline

111 and somatic RNAi, respectively). Parental treatment with *daf-2* RNAi increased lifespan  
112 across all genetic backgrounds, both when matricide was censored (treatment:  $\chi^2 = 90.39$ , df  
113 = 1,  $p < 0.001$ ; strain:  $\chi^2 = 21.8$ , df = 2,  $p < 0.001$ ; treatment  $\times$  strain:  $\chi^2 = 10.46$ , df = 2,  $p =$   
114 0.005, Fig. 3A) and included as dead (treatment:  $\chi^2 = 85.25$ , df = 1,  $p < 0.001$ ; strain:  $\chi^2 =$   
115 20.45, df = 2,  $p < 0.001$ ; treatment  $\times$  strain:  $\chi^2 = 9.43$ , df = 2,  $p = 0.009$ ). In accordance with  
116 previously published research [23], parental *daf-2* RNAi increased egg size (treatment:  $\chi^2 =$   
117 5.11, df = 1,  $p = 0.024$ ; strain:  $\chi^2 = 13.89$ , df = 2,  $p < 0.001$ ; treatment  $\times$  strain:  $\chi^2 = 2.68$ , df =  
118 2,  $p = 0.262$ , Fig. 3B). However, we found that the effect was most pronounced in N2  
119 wildtype worms, and relatively weak in both somatic and germline *daf-2* knockdown (see  
120 Fig. 3B), suggesting that *daf-2* knockdown in both somatic and reproductive tissues is  
121 required to maximize the effect on egg size.

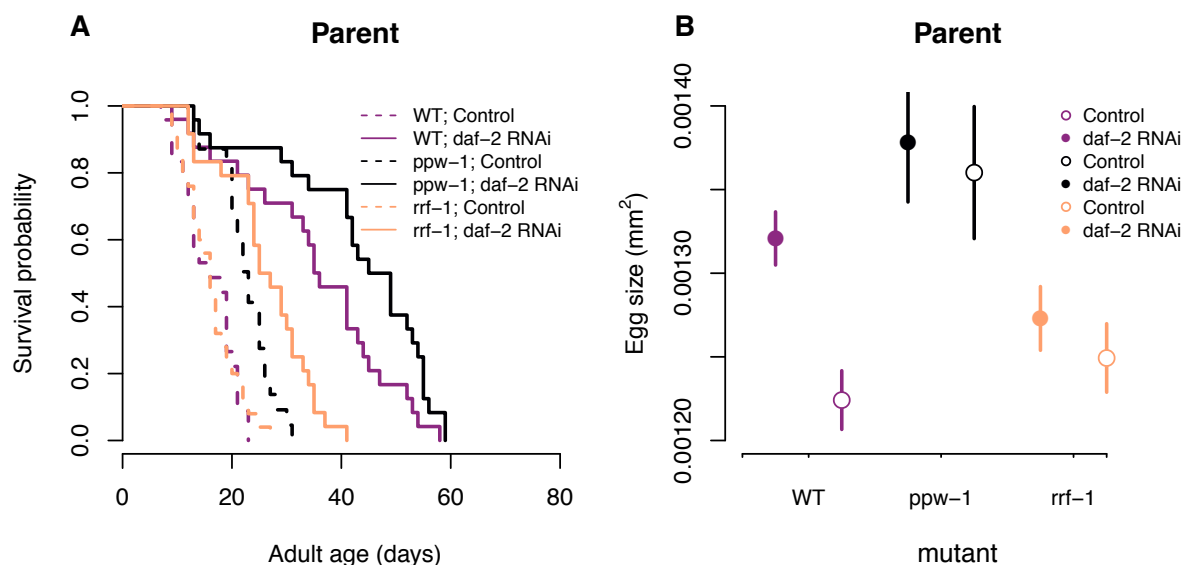

122 **Fig. 3. The effect of *daf-2* RNAi on survival and egg size.** Parental worms, unmated,  
123 exposed to RNAi treatment. (A) Survival probability and (B) egg size of N2 wild-type  
124 (purple), *ppw-1* (black) and *rrf-1* (orange) mutants, treated with either *daf-2* RNAi (solid  
125 lines, filled symbols) or control empty vector (broken lines, open symbols) from adulthood  
126 onwards. Symbols represent mean  $\pm$  SE.

128

129 Parental *daf-2* RNAi treatment did not, however, influence the lifespan of their offspring,  
130 neither when matricidal worms were censored (treatment:  $\chi^2 = 0.04$ ,  $df = 1$ ,  $p = 0.85$ ; strain:  
131  $\chi^2 = 24.2$ ,  $df = 2$ ,  $p < 0.001$ ; treatment  $\times$  strain:  $\chi^2 = 0.61$ ,  $df = 2$ ,  $p = 0.74$ , Fig. 4A) nor when  
132 included as dead (treatment:  $\chi^2 = 0.01$ ,  $df = 1$ ,  $p = 0.92$ ; strain:  $\chi^2 = 21.8$ ,  $df = 2$ ,  $p < 0.001$ ;  
133 treatment  $\times$  strain:  $\chi^2 = 0.48$ ,  $df = 2$ ,  $p = 0.79$ ).

134

135 In contrast, parental *daf-2* RNAi treatment significantly increased offspring total reproduction  
136 (treatment:  $F = 15.9$ ,  $df = 1$ ,  $p < 0.001$ ; strain:  $F = 33.7$ ,  $df = 2$ ,  $p < 0.001$ ; treatment  $\times$  strain:  $F$   
137  $= 0.09$ ,  $df = 2$ ,  $p = 0.91$ , Fig. 4B-C) and individual fitness  $\lambda_{ind}$  (treatment:  $F = 11.8$ ,  $df = 1$ ,  $p$   
138  $< 0.001$ ; strain:  $F = 13.1$ ,  $df = 2$ ,  $p < 0.001$ ; treatment  $\times$  strain:  $F = 0.18$ ,  $df = 2$ ,  $p = 0.84$ , Fig.  
139 4D) across all genetic backgrounds. Importantly, there was no correlation between the effect  
140 of parental *daf-2* RNAi on egg size (see above) and offspring total reproduction / individual  
141 fitness, suggesting that factors beyond the amount of resources in the egg contribute to  
142 increased fitness of offspring of *daf-2* RNAi parents.



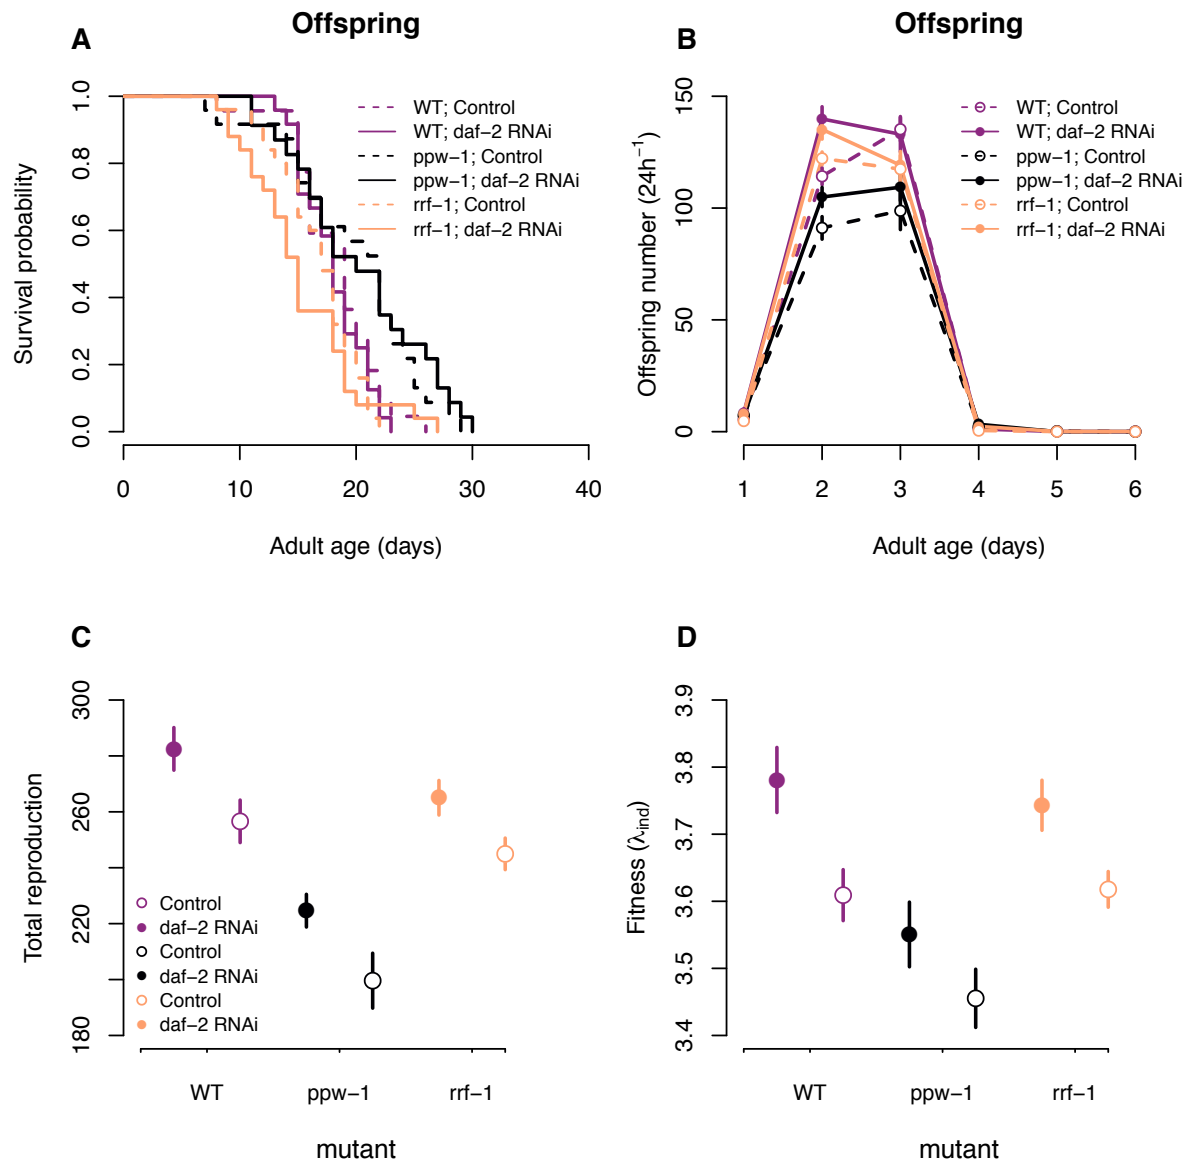

143 **Fig. 4. The effect of parental *daf-2* RNAi on offspring survival and reproduction.**

144 Offspring worms, unmated, on control (empty vector) plates from parents exposed to *daf-2*

145 RNAi or control treatment. (A) Survival probability, (B) daily offspring number, (C) Total

146 reproduction and (D) individual fitness ( $\lambda_{ind}$ ) of offspring (on control plates) from parents

147 either exposed to *daf-2* RNAi (solid lines, filled symbols) or control empty vector (broken

148 lines, open symbols). The colors reflect N2 wild-type (purple), *ppw-1* (black) and *rrf-1*

149 (orange) mutants. Symbols represent mean  $\pm$  SE.

151

152

## 153 Discussion

154 The “disposable soma” theory of ageing proposes that energy allocation between key life-  
155 history traits, such as growth, reproduction and somatic maintenance [1, 24] drive the  
156 evolution of ageing. This theory predicts that genetic and environmental manipulations that  
157 increase energy allocation to somatic maintenance will result in detrimental effects to growth  
158 and reproduction. This is why the findings by Dillin et al. (2002), which suggested that adult-  
159 only downregulation of insulin/IGF-1 by *daf-2* RNAi can substantially increase lifespan  
160 without any detrimental effect to reproduction, were subsequently scrutinized in an attempt to  
161 find the hidden costs of longevity [25, 26]. Nonetheless, both the original findings [10] and  
162 our results here, suggest that adult-only *daf-2* RNAi can more than double longevity without  
163 any negative effect on reproduction. Moreover, when supplied with sperm from males, *daf-2*  
164 RNAi-treated parents have improved fecundity in late-life. It is possible, however, that  
165 treatments that improve parental performance have negative effects on their offspring. The  
166 trade-off between offspring number and offspring quality is a well known concept in life-  
167 history evolution [22] but is rarely considered in biogerontological research [reviewed in 7].  
168 Germline maintenance is costly [7, 27, 28], and increased investment into somatic  
169 maintenance can, in theory, result in increased mutation rate and reduced fitness of progeny.  
170 Alternatively, it is possible that instead of energy trade-offs, the evolution of senescence is  
171 governed by functional trade-offs. Functional trade-offs can occur because the physiological  
172 requirements of a young organism can differ substantially from those of a mature one [17]. In  
173 his classic 1957 paper, George Williams [17] described a hypothetical example of a mutation  
174 that positively affects bone calcification in a developing young organism but increases  
175 calcification of the connective tissues of arteries in a mature one with detrimental  
176 consequences. More recently, it has been suggested that nutrient sensing IIS/TOR molecular  
177 signalling pathways that govern growth and development result in excessive biosynthesis in

178 late-life leading to different pathologies and increased mortality [6, 11, 13, 15]. These  
179 proximate explanations rest on the fundamental assumption that the strength of natural  
180 selection declines with age because of environmental mortality from a range of biotic and  
181 abiotic hazards (e.g. predation, pathogens, competition, starvation) [17]. Because of such  
182 environmental mortality, immediate reproduction is more valuable than future reproduction,  
183 and optimizing development, growth and early-life reproduction is more important for  
184 organismal fitness than optimizing late-life survival and reproduction [17, 29]. Thus, the weak  
185 natural selection in late-life may result in suboptimal levels of IIS/TOR signalling leading to  
186 pathology and senescence [13].

187

188 Here we found that reduced insulin/IGF-1 signalling in adult worms not only improved  
189 longevity and late-life reproduction, but also increased reproduction and Darwinian fitness of  
190 the resulting offspring in three different genetic backgrounds. This result contradicts the  
191 hypothesis that improved longevity and postponed ageing of *daf-2* RNAi parents comes at the  
192 cost of offspring fitness. Instead, our findings are in line with the hypothesis that suboptimal  
193 levels of nutrient-sensing signalling in adult life accelerate ageing, curtail lifespan and reduce  
194 individual fitness. This result was not caused by direct inheritance of *daf-2* RNAi, since we  
195 did not recover the lifespan extension effect of *daf-2* knockdown in these offspring. Because  
196 previous research found that both dietary restriction and reduction in insulin-like signalling  
197 by *daf-2* RNAi knockdown increased embryo size in *C. elegans* nematodes [23], we  
198 replicated these results to test whether increased fitness of adult progeny results from  
199 increased resource allocation to eggs by *daf-2* RNAi mothers. While *daf-2* knockdown  
200 increased egg size to a different degree in N2, *ppw-1* and *rrf-1* strains, there was no  
201 correlation between the effect of parental *daf-2* RNAi on egg size and offspring reproductive  
202 performance. We provisionally conclude that increased egg size under reduced maternal

203 insulin-like signalling can contribute to increased offspring fitness, but it is likely not the sole  
204 source of variation in this trait. Future studies should aim to disentangle the relative  
205 importance of energy allocation trade-offs versus suboptimal late-life gene expression in the  
206 evolution of ageing.

207

## 208 **Materials and Methods**

209

### 210 ***Strains***

211 We used the *Caenorhabditis elegans* strains Bristol N2 wild-type (Brenner, Genetics 1974),  
212 as well as the mutants *ppw-1(pk2505)* and *rrf-1(pk1417)*, obtained from Caenorhabditis  
213 Genetics Center (CGC, Missouri, USA).

214

### 215 ***Maintenance***

216 Before each assay, worms were recovered from freezing and synchronised by bleaching for  
217 two generations to remove any freezing effects. The nematode populations were maintained  
218 at 20°C and 60% relative humidity in an environmental test chamber. For regular  
219 maintenance, the worms were kept on NGM agar supplemented with the antibiotics  
220 streptomycin, kanamycin and nystatin (following Lionaki & Tavernarakis [30]), seeded with  
221 the antibiotic-resistant *E. coli* strain OP50-1 (pUC4K).

222

223

## 224 ***Outline of the study***

225 The study was run in three separate experiments. In the first experiment, we investigated  
226 lifespan and reproduction of mated and unmated N2 hermaphrodites reared from sexual  
227 maturity onwards on *daf-2* RNAi or empty vector (EV, control) plates. For logistic reasons,  
228 this experiment was conducted in two blocks for mated worms and one block for unmated  
229 worms. In the second experiment, we investigated the lifespan and egg size of unmated N2,  
230 *rrf-1(pk1417)* and *ppw-1(pk2505)* hermaphrodites on raised from sexual maturity onwards on  
231 *daf-2* RNAi or EV plates. In a separate experiment, we collected one egg from each parent at  
232 their second day of adulthood (from *daf-2* RNAi and EV treatments) and investigated the  
233 lifespan and reproduction of these offspring on control plates. Because different experiments  
234 differed in setup time, daily reproduction values (and calculations based upon these, such as  
235  $\lambda_{\text{ind}}$ ) are only meaningful for comparison between treatments within each experiment.

236

## 237 ***RNAi***

238 RNase-III deficient, IPTG-inducible HT115 *Escherichia coli* bacteria with empty plasmid  
239 vector (L4440) was used as control [31] and the same HT115 bacteria with *daf-2* RNAi  
240 construct from the Vidal library was used as RNAi treatment. RNAi treatment started from  
241 sexual maturity, and continued until the death of the individual. During the experiments,  
242 worms were maintained on 35 mm NGM agar plates (supplemented with 1 mM IPTG and 50  
243  $\mu\text{g/ml}$  ampicillin) seeded with 0.1 ml L4440 empty vector control or *daf-2* bacteria grown in  
244 LB supplemented with 50  $\mu\text{g/ml}$  ampicillin for 16-20 hours and seeded (incubated) on the  
245 NGM agar plates again for 24 hours (following Hinas et al. [32]).

246

247

248 ***Lifespan Assays***

249 Lifespan assays were set up for all treatment combinations described above. In the lifespan  
250 assays, the individual age-synchronised L4 worms were placed on separate 35 mm plates and  
251 the plates were checked daily to record any instances of death. The surviving worms were  
252 moved to new plates daily until their death. Fertile worms, which showed odd developmental  
253 characteristics and low offspring numbers (<36 offspring), were excluded from the final  
254 analysis (3 mated control worms and 7 mated *daf-2* worms).

255

256 ***Reproduction assays***

257 Offspring production was scored in the reproduction assays using the same worms as those  
258 scored for lifespan, except for the parental N2, *ppw-1* and *rrf-1* worms in the second  
259 experiment, where only lifespan was recorded. Unmated individual hermaphrodites were  
260 moved to new plates daily and scored for offspring produced 2.5 days later. In the “mated”  
261 treatment, two male *C. elegans* (from the initial sample population of N2 strain) were placed  
262 on a plate with a single hermaphrodite for two hours every day to allow time for mating.  
263 Offspring production was scored 2.5 days later, as in the “unmated” treatment.

264

265 ***Egg size assays***

266 Egg size was measured in N2, *ppw-1* and *rrf-1* strains (unmated hermaphrodites) growing on  
267 either *daf-2* RNAi or empty vector (EV) plates. Two days after maturation, worms were  
268 placed individually on new plates and observed continually during five hours for the presence  
269 of newly laid eggs, of which the first two eggs were collected. Eggs were picked immediately  
270 after laying and placed under a Leica M165C microscope set on 12x magnification; photos

271 were taken using a Lumenera Infinity 2-6C digital microscope camera. Egg size was analysed  
272 from photos using *ImageJ* (<https://imagej.nih.gov/ij/>). Only eggs laid during gastrulation  
273 stage (the normal developmental stage at egg laying) were included in the analyses.

274

### 275 ***Statistical analyses***

276 Survival was analysed for each experiment in Cox proportional hazard models in *R* 3.3.3.  
277 Mated (EV: n=72, *daf-2* n=68) and unmated (n=25 per treatment) individuals were analysed  
278 separately, as they were run in different blocks. Unmated individuals were analysed using the  
279 *coxph* function in the package *survival*, with *daf-2* RNAi treatment as a fixed factor. For  
280 mated individuals, we used the *coxme* package in order to fit block as a random effect, in  
281 addition to the fixed effect of RNAi treatment. In the second experiment (n=25 per  
282 treatment), in addition to RNAi treatment, we also fitted the fixed factor strain (N2, *ppw-1*,  
283 *rrf-1*) and its interaction with treatment using the *coxph* function in the *survival* package.

284 Reproduction was analysed as total reproduction as well as rate-sensitive individual fitness  
285  $\lambda_{\text{ind}}$ , which encompasses the timing and number of offspring [33, 34].  $\lambda_{\text{ind}}$  is estimated by  
286 solving the Euler-Lotka equation for each individual using the *lambda* function in the *popbio*  
287 package and is analogous to the intrinsic rate of population growth (Stearns 1992). For all  
288 unmated worms (n=25 per treatment), we estimated the fixed effect of treatment (*daf-2* RNAi  
289 or empty vector). For offspring of the three mutants (n=25 per treatment), we also estimated  
290 the fixed effect or strain, using linear models. For the mated worms (EV: n=72, *daf-2* n=68),  
291 we also estimated the random effect of block, in addition to RNAi treatment. These models  
292 were implemented as mixed effect models using the *lme4* package in *R* 3.3.3, and chi-square  
293 tests of fixed effects were performed using the *car* package. Egg size was analysed in a  
294 mixed effect model in *lme4*, treating strain and RNAi treatment as crossed fixed effects, and

295 parent ID as well as block as random effects. We obtained the following n: N2 on EV: 56, N2  
296 on *daf-2*: 54, *ppw-1* on EV: 44, *ppw-1* on *daf-2*: 42, *rrf-1* on EV: 59, *rrf-1* on *daf-2*: 42.

297

## 298 **References**

- 299 1. Kirkwood T.B.L. 1977 Evolution of aging. *Nature* **270**(5635), 301-304.
- 300 2. Kirkwood T.B.L., Holliday R. 1979 Evolution of aging and longevity. *Proceedings of*  
301 *the Royal Society of London Series B-Biological Sciences* **205**(1161), 531-546.
- 302 3. Kirkwood T.B.L., Austad S.N. 2000 Why do we age? *Nature* **408**(6809), 233-238.
- 303 4. Antebi A. 2013 Regulation of longevity by the reproductive system. *Experimental*  
304 *Gerontology* **48**(7), 596-602. (doi:10.1016/j.exger.2012.09.009).
- 305 5. Flatt T. 2011 Survival costs of reproduction in *Drosophila*. *Experimental Gerontology*  
306 **46**(5), 369-375. (doi:10.1016/j.exger.2010.10.008).
- 307 6. Gems D., Partridge L. 2013 Genetics of longevity in model organisms: debates and  
308 paradigm shifts. *Annual Review of Physiology* **75**, 621-644. (doi:10.1146/annurev-physiol-  
309 030212-183712).
- 310 7. Maklakov A.A., Immler S. 2016 The expensive germline and the evolution of ageing.  
311 *Current Biology* **26**(13), R577-R586.
- 312 8. Kenyon C. 2011 The first long-lived mutants: discovery of the insulin/IGF-1 pathway  
313 for ageing. *Philosophical Transactions of the Royal Society B-Biological Sciences* **366**(1561),  
314 9-16. (doi:10.1098/rstb.2010.0276).
- 315 9. Kenyon C. 2005 The plasticity of aging: Insights from long-lived mutants. *Cell*  
316 **120**(4), 449-460. (doi:10.1016/j.cell.2006.02.002).
- 317 10. Dillin A., Crawford D.K., Kenyon C. 2002 Timing requirements for insulin/IGF-1  
318 signaling in *C-elegans*. *Science* **298**(5594), 830-834. (doi:10.1126/science.1074240).



- 319 11. Blagosklonny M.V. 2006 Aging and immortality - Quasi-programmed senescence and  
320 its pharmacologic inhibition. *Cell Cycle* **5**(18), 2087-2102. (doi:10.4161/cc.5.18.3288).
- 321 12. Dhondt I., Petyuk V.A., Cai H.H., Vandemeulebroucke L., Vierstraete A., Smith  
322 R.D., Depuydt G., Braeckman B.P. 2016 FOXO/DAF-16 activation slows down turnover of  
323 the majority of proteins in *C. elegans*. *Cell Reports* **16**(11), 3028-3040.  
324 (doi:10.1016/j.celrep.2016.07.088).
- 325 13. Ezcurra M, Benedetto A, Sornda T, Gilliat AF, Au C, Zhang Q, van Schelt S,  
326 Petrache AL, Wang H, de la Guardia Yila, et al. 2018 *C. elegans* eats its own intestine to  
327 make yolk leading to multiple senescent pathologies. *Current Biology* **28**, 2544-2556.
- 328 14. Park M., Wang M.C. 2018 Aging: Antagonistic pleiotropy supported by gut eating.  
329 *Current Biology* **28**(16), R890-R892. (doi:10.1016/j.cub.2018.07.011).
- 330 15. Blagosklonny M.V. 2010 Revisiting the antagonistic pleiotropy theory of aging TOR-  
331 driven program and quasi-program. *Cell Cycle* **9**(16), 3151-3156.  
332 (doi:10.4161/cc.9.16.13120).
- 333 16. Kenyon C.J. 2010 The genetics of ageing. *Nature* **464**(7288), 504-512.  
334 (doi:10.1038/nature08980).
- 335 17. Williams G.C. 1957 Pleiotropy, natural selection, and the evolution of senescence.  
336 *Evolution* **11**(4), 398-411.
- 337 18. Sivasundar A., Hey J. 2005 Sampling from natural populations with RNAi reveals  
338 high outcrossing and population structure in *Caenorhabditis elegans*. *Current Biology* **15**(17),  
339 1598-1602. (doi:10.1016/j.cub.2005.08.034).
- 340 19. Maures T.J., Booth L.N., Benayoun B.A., Izrayelit Y., Schroeder F.C., Brunet A.  
341 2013 Males shorten the life span of *C. elegans* hermaphrodites via secreted compounds.  
342 *Science* **1244160**.

- 343 20. Shi C., Murphy C.T. 2014 Mating induces shrinking and death in *Caenorhabditis*  
344 mothers. *Science Express*, 1-7.
- 345 21. Aprison E.Z., Ruvinsky I. 2016 Sexually antagonistic male signals manipulate  
346 germline and soma of *C. elegans* hermaphrodites. *Current Biology* **00**, XXX-XXX.
- 347 22. Stearns S.C. 1992 *The Evolution of Life Histories*. New York, Oxford University  
348 Press.
- 349 23. Hibshman JD, Hung A, LR B. 2016 Maternal diet and insulin-like signaling control  
350 intergenerational plasticity of progeny size and starvation resistance. *PLoS Genetics* **DOI:**  
351 **10.1371/journal.pgen.1006396**.
- 352 24. Kirkwood T.B.L. 2017 The disposable soma theory of ageing. In *The Evolution of*  
353 *Senescence in the Tree of Life* (eds. Shefferson RP, Jones OR, R S.-G.), pp. 23-39.  
354 Cambridge, United Kingdom, Cambridge University Press.
- 355 25. Jenkins N.L., McColl G., Lithgow G.J. 2004 Fitness cost of extended lifespan in  
356 *Caenorhabditis elegans*. *Proceedings of the Royal Society of London Series B-Biological*  
357 *Sciences* **271**(1556), 2523-2526. (doi:10.1098/rspb.2004.2897).
- 358 26. Partridge L., Gems D., Withers D.J. 2005 Sex and death: What is the connection? *Cell*  
359 **120**(4), 461-472.
- 360 27. Agrawal A.F., Wang A.D. 2008 Increased transmission of mutations by low-condition  
361 females: Evidence for condition-dependent DNA repair. *Plos Biology* **6**(2), 389-395.  
362 (doi:10.1371/journal.pbio.0060030).
- 363 28. Sniegowski P.D., Gerrish P.J., Johnson T., Shaver A. 2000 The evolution of mutation  
364 rates: separating causes from consequences. *Bioessays* **22**(12), 1057-1066.
- 365 29. Maklakov A.A., Rowe L., Friberg U. 2015 Why organisms age: Evolution of  
366 senescence under positive pleiotropy? *Bioessays* **37**(7), 802-807.  
367 (doi:10.1002/bies.201500025).

- 368 30. Lionaki E., Tavernarakis N. 2013 High-throughput and longitudinal analysis of aging  
369 and senescent decline in *Caenorhabditis elegans*. In *Cell Senescence* (eds. Lorenzo Galluzzi,  
370 Ilio Vitale, Oliver Kepp, Kroemer G.), pp. 485-500.
- 371 31. Timmons L., Court D.L., Fire A. 2001 Ingestion of bacterially expressed dsRNAs can  
372 produce specific and potent genetic interference in *Caenorhabditis elegans*. *Gene* **263**(1-2),  
373 103-112. (doi:10.1016/s0378-1119(00)00579-5).
- 374 32. Hinas A., Wright A.J., Hunter C.P. 2012 SID-5 is an endosome-associated protein  
375 required for efficient systemic RNAi in *C. elegans*. *Current Biology* **22**(20), 1938-1943.  
376 (doi:10.1016/j.cub.2012.08.020).
- 377 33. Brommer J.E., Merila J., Kokko H. 2002 Reproductive timing and individual fitness.  
378 *Ecology Letters* **5**(6), 802-810. (doi:10.1046/j.1461-0248.2002.00369.x).
- 379 34. Lind M.I., Zwoinska M.K., Meurling S., Carlsson H., Maklakov A.A. 2016 Sex-  
380 specific trade-offs with growth and fitness following lifespan extension by rapamycin in an  
381 outcrossing nematode, *Caenorhabditis remanei*. *Journals of Gerontology Series a-Biological*  
382 *Sciences and Medical Sciences* **71**, 882-890.

383

384 **Author contributions**

385 MIL and AAM designed the study, with the aid of AH. SR, ZS, MIL and HC collected the  
386 data, MIL analysed the data, MIL and AAM drafted the manuscript. All authors contributed  
387 to the revision of the manuscript.

388 **Acknowledgements**

389 This work was supported by ERC Consolidator Grant 724909 GermlineAgeingSoma to AAM  
390 and Swedish Research Council VR Grant 2016-05195 to MIL.

391 **Competing interests**

392 The authors declare no competing interests.

393

394 **Data archiving**

395 Upon acceptance, the data will be archived at Dryad.
